# Supplementary material
Source: ML conference proceedings conference paper supplement (https://proceedings.mlr.press/v119/hu20b.html)
Supplement: Supplementary file [file hu20b-supp.pdf]

---

# XTREME: A Massively Multilingual Multi-task Benchmark for Evaluating Cross-lingual Generalization

---

Junjie Hu<sup>\*1</sup> Sebastian Ruder<sup>\*2</sup> Aditya Siddhant<sup>3</sup> Graham Neubig<sup>1</sup> Orhan Firat<sup>3</sup> Melvin Johnson<sup>3</sup>

## Appendix

### A. Languages

We show a detailed overview of languages in the cross-lingual benchmark including interesting typological differences in Table 1. Wikipedia information is taken from Wikipedia<sup>1</sup> and linguistic information from WALS Online<sup>2</sup>. XTREME includes members of the Afro-Asiatic, Austro-Asiatic, Austronesian, Dravidian, Indo-European, Japonic, Kartvelian, Kra-Dai, Niger-Congo, Sino-Tibetan, Turkic, and Uralic language families as well as of two isolates, Basque and Korean.

### B. Hyper-parameters

Table 2 summarizes the hyper-parameters of baseline and state-of-the-art models. We refer to XLM-100 as XLM, and XLM-R-large as XLM-R in our paper to simplify the notation.

**mBERT** We use the cased version, which covers 104 languages, has 12 layers, 768 hidden units per layer, 12 attention heads, a 110k shared WordPiece vocabulary, and 110M parameters.<sup>3</sup> The model was trained using Wikipedia data in all 104 languages, oversampling low-resource languages with an exponential smoothing factor of 0.7. We generally fine-tune mBERT for two epochs, with a training batch size of 32 and a learning rate of 2e-5. For training BERT models on the QA tasks, we use the original BERT codebase. For all other tasks, we use the Transformers library (Wolf et al., 2019).

**XLM and XLM-R** We use the XLM and XLM-R Large versions that cover 100 languages, use a 200k shared BPE vocabulary, and that have been trained with masked lan-

guage modelling.<sup>4</sup> We fine-tune both for two epochs with a learning rate of 3e-5 and an effective batch size of 16. In contrast to XLM, XLM-R does not use language embeddings. We use the Transformers library for training XLM and XLM-R models on all tasks.

### C. Translations for QA datasets

We use an in-house translation tool to obtain translations for our datasets. For the question answering tasks (XQuAD and MLQA), the answer span is often not recoverable if the context is translated directly. We experimented with enclosing the answer span in the English context in quotes (Lee et al., 2018; Lewis et al., 2019) but found that quotes were often dropped in translations (at different rates depending on the language). We found that enclosing the answer span in HTML tags (e.g. `<b>` and `</b>`) worked more reliably. If this fails, as a back-off we fuzzy match the translated answer with the context similar to (Hsu et al., 2019). If the minimal edit distance between the closest match and the translated answer is larger than  $\min(10, \text{answer\_len}/2)$ , we drop the example. On the whole, using this combination, we recover more than 97% of all answer spans in training and test data.

### D. Performance on translated test sets

We show results comparing the performance of mBERT and translate-train (mBERT) baselines on the XQuAD test sets with automatically translated test sets in Table 3. Performance on the automatically translated test sets underestimates the performance of mBERT by 2.9 F1 / 0.2 EM points but overestimates the performance of the translate-train baseline by 4.0 F1 / 6.7 EM points. The biggest part of this margin is explained by the difference in scores on the Thai test set. Overall, this indicates that automatically translated test sets are useful as a proxy for cross-lingual performance but may not be reliable for evaluating models that have been trained on translations as these have learnt to exploit the biases of *translationese*.

---

<sup>\*</sup>Equal contribution <sup>1</sup>Carnegie Mellon University <sup>2</sup>DeepMind <sup>3</sup>Google Research. Correspondence to: Junjie Hu <junjieh@cs.cmu.edu>, Melvin Johnson <melvinp@google.com>.

<sup>1</sup>[https://meta.wikimedia.org/wiki/List\\_of\\_Wikipedias](https://meta.wikimedia.org/wiki/List_of_Wikipedias)

<sup>2</sup><https://wals.info/languoid>

<sup>3</sup><https://github.com/google-research/bert/blob/master/multilingual.md>

<sup>4</sup><https://github.com/facebookresearch/XLM>

**XTREME: A Benchmark for Evaluating Cross-lingual generalization**

*Table 1.* Statistics about languages in the cross-lingual benchmark. Languages belong to 12 language families and two isolates, with Indo-European (IE) having the most members. Diacritics / special characters: Language adds diacritics (additional symbols to letters). Compounding: Language makes extensive use of word compounds. Bound words / clitics: Function words attach to other words. Inflection: Words are inflected to represent grammatical meaning (e.g. case marking). Derivation: A single token can represent entire phrases or sentences.

| Language   | ISO 639-1 code | # Wikipedia articles (in millions) | Script            | Language family | Diacritics / special characters | Extensive compounding | Bound words / clitics | Inflection | Derivation | # datasets with language |
|------------|----------------|------------------------------------|-------------------|-----------------|---------------------------------|-----------------------|-----------------------|------------|------------|--------------------------|
| Afrikaans  | af             | 0.09                               | Latin             | IE: Germanic    |                                 | X                     |                       |            |            | 3                        |
| Arabic     | ar             | 1.02                               | Arabic            | Afro-Asiatic    | X                               |                       | X                     | X          |            | 7                        |
| Basque     | eu             | 0.34                               | Latin             | Basque          | X                               |                       | X                     | X          | X          | 3                        |
| Bengali    | bn             | 0.08                               | Brahmic           | IE: Indo-Aryan  | X                               | X                     | X                     | X          | X          | 3                        |
| Bulgarian  | bg             | 0.26                               | Cyrillic          | IE: Slavic      | X                               |                       | X                     | X          |            | 4                        |
| Burmese    | my             | 0.05                               | Brahmic           | Sino-Tibetan    | X                               | X                     |                       |            |            | 1                        |
| Dutch      | nl             | 1.99                               | Latin             | IE: Germanic    |                                 | X                     |                       |            |            | 3                        |
| English    | en             | 5.98                               | Latin             | IE: Germanic    |                                 |                       |                       |            |            | 9                        |
| Estonian   | et             | 0.20                               | Latin             | Uralic          | X                               | X                     |                       | X          | X          | 3                        |
| Finnish    | fi             | 0.47                               | Latin             | Uralic          |                                 |                       |                       | X          | X          | 3                        |
| French     | fr             | 2.16                               | Latin             | IE: Romance     | X                               |                       | X                     |            |            | 6                        |
| Georgian   | ka             | 0.13                               | Georgian          | Kartvelian      |                                 |                       |                       | X          | X          | 2                        |
| German     | de             | 2.37                               | Latin             | IE: Germanic    |                                 | X                     |                       | X          |            | 8                        |
| Greek      | el             | 0.17                               | Greek             | IE: Greek       | X                               | X                     |                       | X          |            | 5                        |
| Hebrew     | he             | 0.25                               | Hebrew            | Afro-Asiatic    |                                 |                       |                       | X          |            | 3                        |
| Hindi      | hi             | 0.13                               | Devanagari        | IE: Indo-Aryan  | X                               | X                     | X                     | X          | X          | 6                        |
| Hungarian  | hu             | 0.46                               | Latin             | Uralic          | X                               | X                     |                       | X          | X          | 4                        |
| Indonesian | id             | 0.51                               | Latin             | Austronesian    |                                 |                       | X                     | X          | X          | 4                        |
| Italian    | it             | 1.57                               | Latin             | IE: Romance     | X                               |                       | X                     |            |            | 3                        |
| Japanese   | ja             | 1.18                               | Ideograms         | Japonic         |                                 |                       | X                     | X          |            | 4                        |
| Javanese   | jv             | 0.06                               | Brahmic           | Austronesian    | X                               |                       | X                     |            |            | 1                        |
| Kazakh     | kk             | 0.23                               | Arabic            | Turkic          | X                               |                       |                       | X          | X          | 1                        |
| Korean     | ko             | 0.47                               | Hangul            | Koreanic        |                                 | X                     |                       | X          | X          | 5                        |
| Malay      | ms             | 0.33                               | Latin             | Austronesian    |                                 |                       | X                     | X          |            | 2                        |
| Malayalam  | ml             | 0.07                               | Brahmic           | Dravidian       | X                               | X                     | X                     | X          |            | 2                        |
| Mandarin   | zh             | 1.09                               | Chinese ideograms | Sino-Tibetan    |                                 | X                     |                       |            |            | 8                        |
| Marathi    | mr             | 0.06                               | Devanagari        | IE: Indo-Aryan  |                                 |                       | X                     | X          |            | 3                        |
| Persian    | fa             | 0.70                               | Perso-Arabic      | IE: Iranian     |                                 | X                     |                       |            |            | 2                        |
| Portuguese | pt             | 1.02                               | Latin             | IE: Romance     | X                               |                       | X                     |            |            | 3                        |
| Russian    | ru             | 1.58                               | Cyrillic          | IE: Slavic      |                                 |                       |                       | X          |            | 7                        |
| Spanish    | es             | 1.56                               | Latin             | IE: Romance     | X                               |                       | X                     |            |            | 7                        |
| Swahili    | sw             | 0.05                               | Latin             | Niger-Congo     |                                 |                       | X                     | X          | X          | 3                        |
| Tagalog    | tl             | 0.08                               | Brahmic           | Austronesian    | X                               |                       | X                     | X          |            | 1                        |
| Tamil      | ta             | 0.12                               | Brahmic           | Dravidian       | X                               | X                     | X                     | X          | X          | 3                        |
| Telugu     | te             | 0.07                               | Brahmic           | Dravidian       | X                               | X                     | X                     | X          | X          | 4                        |
| Thai       | th             | 0.13                               | Brahmic           | Kra-Dai         | X                               |                       |                       |            |            | 4                        |
| Turkish    | tr             | 0.34                               | Latin             | Turkic          | X                               | X                     |                       | X          | X          | 5                        |
| Urdu       | ur             | 0.15                               | Perso-Arabic      | IE: Indo-Aryan  | X                               | X                     | X                     | X          | X          | 4                        |
| Vietnamese | vi             | 1.24                               | Latin             | Austro-Asiatic  | X                               |                       |                       |            |            | 6                        |
| Yoruba     | yo             | 0.03                               | Arabic            | Niger-Congo     | X                               |                       |                       |            |            | 1                        |

Table 2. Hyper-parameters of baseline and state-of-the-art models. We do not use XLM-15 and XLM-R-Base in our experiments.

| Model       | Parameters  | Langs | Vocab size | Layers |
|-------------|-------------|-------|------------|--------|
| BERT-large  | 364,353,862 | 1     | 28,996     | 24     |
| mBERT       | 178,566,653 | 104   | 119,547    | 12     |
| MMTE        | 191,733,123 | 103   | 64,000     | 6      |
| XLM-15      | 346,351,384 | 15    | 95,000     | 12     |
| XLM-100     | 827,696,960 | 100   | 200,000    | 12     |
| XLM-R-Base  | 470,295,954 | 100   | 250,002    | 12     |
| XLM-R-Large | 816,143,506 | 100   | 250,002    | 24     |

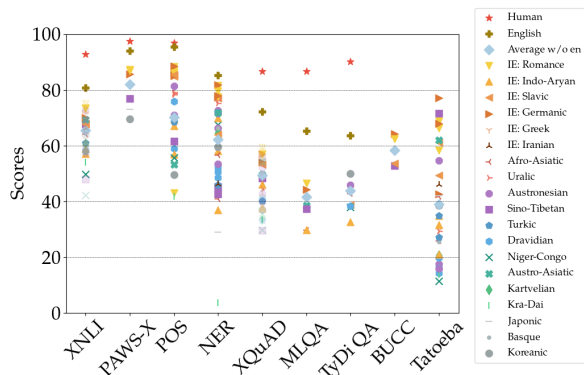

Figure 1. An overview of mBERT’s performance on the XTREME tasks for the languages of each task. We highlight an estimate of human performance, performance on the English test set, the average of all languages excluding English, and the family of each language. Performance on pseudo test sets for XNLI and XQuAD is shown with slightly transparent markers.

## E. mBERT performance across tasks and languages

We show the performance of mBERT across all tasks and languages of XTREME in Table 1.

## F. Correlation with pretraining data size

We show the Pearson correlation coefficient  $\rho$  of mBERT, XLM, and XLM-R with the number of Wikipedia articles in Table 5. XLM and mBERT were pretrained on Wikipedia, while XLM-R was pretrained on data from the web.

## G. Generalization to unseen tag combinations

We show the performance of mBERT on POS tag trigrams and 4-grams that were seen and not seen in the English training data in Table 6.

## H. Generalization to unseen entities

We show the performance of mBERT on entities in the target language NER dev data that were seen and not seen in the English NER training data in Table 7. For simplicity, we count an entity as occurring in the English training data if a subset of at least two tokens matches with an entity in the English training data. As most matching entities in the target language data only consist of up to two tokens, are somewhat frequent, and consist only of Latin characters, we provide the performance on all entities fitting each criterion respectively for comparison. For all target languages in the table except Spanish, entities that appeared in the English training data are more likely to be tagged correctly than ones that did not. The differences are largest for two languages that are typologically distant to English, Indonesian (id) and Swahili (sw). For most languages, entities that appear in the English training data are similarly likely to be correctly classified as entities that are either frequent, appear in Latin characters, or are short. However, for Swahili and Basque (eu), mBERT does much better on entities that appeared in the English training data compared to the comparison entities. Another interesting case is Georgian (ka), which uses a unique script. The NER model is very good at recognizing entities that are written in Latin script but performs less well on entities in Georgian script.

## I. Sentence representations across all layers

For sentence retrieval tasks, we analyze whether the multilingual sentence representations obtained from all layers are well-aligned in the embedding spaces. Without fine-tuning on any parallel sentences at all, we explore three ways of extracting the sentence representations from all the models: (1) the embeddings of the first token in the last layer, also known as [CLS] token; (2) the average word embeddings in each layer; (3) the concatenation of the average word embeddings in the bottom, middle, and top 4 layers, i.e., Layer 1 to 4 (bottom), Layer 5 to 8 (middle), Layer 9 to 12 (top). Figure 2 shows the F1 scores of the average word embeddings in each layer of mBERT in the BUCC task. We observe that the average word embeddings in the middle layers, e.g., Layer 6 to 8, perform better than that in the bottom or the top layers. In Table 10, we show the performance of these three types of sentence embeddings in the BUCC task. The embeddings of the CLS token perform relatively bad in cross-lingual retrieval tasks. We conjecture that the CLS embeddings highly abstract the semantic meaning of a sentence, while they lose the token-level information which is important for matching two translated sentences in two languages. With respect to the concatenation of average word embeddings from four continuous layers, We also observe that embeddings from the middle layers perform better than that from the bottom and top layers. Average word embed-

## XTREME: A Benchmark for Evaluating Cross-lingual generalization

Table 3. Comparison of F1 and EM scores of mBERT and translate-train (mBERT) baselines on XQuAD test sets (gold), which were translated by professional translators and automatically translated test sets (auto).

|                 | Test set | es          | de          | el          | ru          | tr          | ar          | vi          | th          | zh          | hi          | avg         |
|-----------------|----------|-------------|-------------|-------------|-------------|-------------|-------------|-------------|-------------|-------------|-------------|-------------|
| mBERT           | gold     | 75.6 / 56.9 | 70.6 / 54.0 | 62.6 / 44.9 | 71.3 / 53.3 | 55.4 / 40.1 | 61.5 / 45.1 | 69.5 / 49.6 | 42.7 / 33.5 | 58.0 / 48.3 | 59.2 / 46.0 | 62.6 / 47.2 |
|                 | auto     | 76.1 / 58.7 | 64.3 / 49.9 | 57.9 / 42.5 | 68.3 / 51.8 | 55.6 / 42.9 | 62.1 / 48.6 | 68.6 / 54.3 | 41.1 / 32.6 | 48.5 / 47.7 | 54.1 / 40.9 | 59.7 / 47.0 |
| translate-train | gold     | 80.2 / 63.1 | 75.6 / 60.7 | 70.0 / 53.0 | 75.0 / 59.7 | 68.9 / 54.8 | 68.0 / 51.1 | 75.6 / 56.2 | 36.9 / 33.5 | 66.2 / 56.6 | 69.6 / 55.4 | 68.7 / 54.6 |
|                 | auto     | 80.7 / 66.0 | 71.1 / 58.9 | 69.3 / 54.5 | 75.7 / 61.5 | 71.2 / 59.1 | 74.3 / 60.7 | 76.8 / 64.0 | 79.5 / 74.8 | 59.3 / 58.0 | 69.1 / 55.2 | 72.7 / 61.3 |

Table 4. Comparison of accuracy scores of mBERT baseline on XNLI test sets (gold), which were translated by professional translators and automatically translated test sets (auto) in 14 languages. BLEU and chrF scores are computed to measure the translation quality between gold and automatically translated test sets.

| Languages | zh    | es    | de    | ar    | ur    | ru    | bg    | el    | fr    | hi    | sw    | th    | tr    | vi    | avg   |
|-----------|-------|-------|-------|-------|-------|-------|-------|-------|-------|-------|-------|-------|-------|-------|-------|
| auto Acc. | 69.1  | 74.7  | 72.8  | 66.5  | 64.5  | 71.6  | 70.2  | 67.7  | 74.3  | 65.1  | 50.2  | 54.5  | 60.0  | 72.7  | 66.7  |
| gold Acc. | 67.8  | 73.5  | 70.0  | 64.3  | 57.2  | 67.8  | 68.0  | 65.3  | 73.4  | 58.9  | 49.7  | 54.1  | 60.9  | 69.3  | 64.3  |
| BLEU      | 40.92 | 43.46 | 30.94 | 32.35 | 20.13 | 22.62 | 45.04 | 60.29 | 47.91 | 29.55 | 31.25 | 10.65 | 15.39 | 56.93 | 34.82 |
| chrF      | 35.96 | 67.92 | 60.28 | 59.64 | 48.21 | 50.38 | 67.52 | 75.34 | 69.58 | 53.85 | 59.84 | 54.89 | 51.46 | 69.37 | 58.87 |

Table 5. Pearson correlation coefficients ( $\rho$ ) of zero-shot transfer performance and Wikipedia size across datasets and models.

|       | XNLI | PAWS-X | POS  | NER  | XQuAD | MLQA | TyDiQA-GoldP | BUCC | Tatoeba |
|-------|------|--------|------|------|-------|------|--------------|------|---------|
| mBERT | 0.79 | 0.81   | 0.36 | 0.35 | 0.80  | 0.87 | 0.82         | 0.95 | 0.68    |
| XLM   | 0.80 | 0.76   | 0.32 | 0.29 | 0.74  | 0.73 | 0.52         | 0.61 | 0.68    |
| XLM-R | 0.75 | 0.79   | 0.22 | 0.27 | 0.50  | 0.76 | 0.14         | 0.36 | 0.49    |

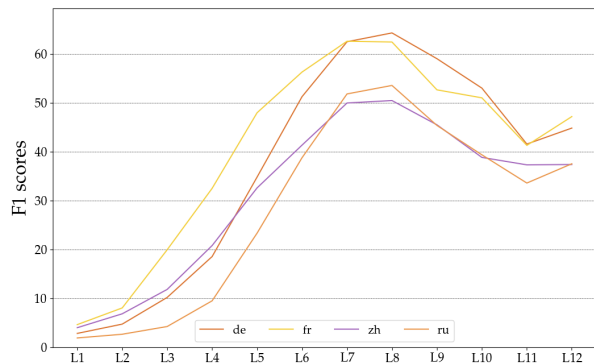

Figure 2. Comparison of mBERT’s sentence representations by averaging word embeddings in each layer in the BUCC task.

dings in the middle individual layer perform comparative to the concatenated embeddings from the middle four layers.

### I.1. Language Families and Scripts

We also report the performance of XLM-R in all the tasks across different language families and writing scripts in Figure 3.

## J. Results for each task and language

We show the detailed results for all tasks and languages in Tables 8 (XNLI), 11 (PAWS-X), 16 (POS), 17 (NER), 13

Table 6. Accuracy of mBERT on the target language dev data on POS tag trigrams and 4-grams that appeared and did not appear in the English training data. We show the average performance across all non-English languages and the difference of said average compared to the English performance on the bottom.

|      | trigram, seen | trigram, unseen | 4-gram, seen | 4-gram, unseen |
|------|---------------|-----------------|--------------|----------------|
| en   | 90.3          | 63.0            | 88.1         | 67.5           |
| af   | 68.1          | 8.2             | 64.1         | 24.2           |
| ar   | 22.0          | 0.7             | 14.9         | 4.6            |
| bg   | 63.1          | 14.6            | 56.1         | 23.9           |
| de   | 77.8          | 47.2            | 73.0         | 48.7           |
| el   | 59.6          | 9.1             | 52.5         | 14.2           |
| es   | 68.6          | 10.6            | 62.4         | 24.9           |
| et   | 60.7          | 14.4            | 53.1         | 31.9           |
| eu   | 32.8          | 7.1             | 28.7         | 8.1            |
| he   | 52.7          | 35.7            | 44.0         | 27.4           |
| hi   | 38.7          | 13.0            | 32.6         | 12.5           |
| hu   | 55.5          | 28.8            | 46.9         | 23.7           |
| id   | 60.8          | 16.6            | 54.7         | 21.6           |
| it   | 75.5          | 12.8            | 71.8         | 23.5           |
| ja   | 16.3          | 0.0             | 12.3         | 1.0            |
| ko   | 22.0          | 2.9             | 14.7         | 3.8            |
| mr   | 31.7          | 0.0             | 25.5         | 3.3            |
| nl   | 75.5          | 24.1            | 71.0         | 37.8           |
| pt   | 76.2          | 14.9            | 71.2         | 30.6           |
| ru   | 69.1          | 4.8             | 63.8         | 20.6           |
| ta   | 30.3          | 0.0             | 24.5         | 4.2            |
| te   | 57.8          | 0.0             | 48.7         | 24.7           |
| tr   | 41.2          | 6.2             | 33.9         | 10.1           |
| ur   | 30.6          | 18.3            | 22.3         | 10.9           |
| zh   | 29.0          | 0.0             | 21.7         | 3.9            |
| avg  | 50.6          | 12.1            | 44.3         | 18.3           |
| diff | 39.7          | 50.9            | 43.7         | 49.2           |

Table 7. Comparison of accuracies for entities in the target language NER dev data that were seen in the English NER training data (a); were not seen in the English NER training data (b); only consist of up to two tokens (c); only consist of Latin characters (d); and occur at least twice in the dev data (e). We only show languages where the sets (a–e) contain at least 100 entities each. We show the difference between (a) and (b) and the minimum difference between (a) and (c–e).

|                  | af   | de   | el   | en   | es   | et   | eu   | fi   | fr   | he   | hu   | id   | it   | ka   | ms   | nl   | pt   | ru   | sw   | tr   | vi   |
|------------------|------|------|------|------|------|------|------|------|------|------|------|------|------|------|------|------|------|------|------|------|------|
| (a) Seen         | 94.7 | 88.3 | 91.4 | 91.9 | 76.3 | 88.3 | 83.6 | 85.3 | 90.5 | 78.2 | 90.7 | 89.4 | 88.4 | 92.3 | 88.6 | 93.5 | 88.6 | 83.9 | 96.3 | 85.2 | 91.4 |
| (b) Not seen     | 82.1 | 80.2 | 74.8 | 84.6 | 80.4 | 78.9 | 69.4 | 79.8 | 80.1 | 56.5 | 78.3 | 58.0 | 81.5 | 70.2 | 75.0 | 82.9 | 82.3 | 68.5 | 66.6 | 73.7 | 73.4 |
| (a) – (b)        | 12.6 | 8.1  | 16.5 | 7.2  | -4.1 | 9.4  | 14.1 | 5.5  | 10.4 | 21.7 | 12.3 | 31.5 | 6.9  | 22.1 | 13.6 | 10.6 | 6.4  | 15.4 | 29.7 | 11.6 | 18.0 |
| (c) Short        | 86.5 | 82.9 | 80.3 | 88.2 | 86.6 | 81.7 | 72.5 | 83.9 | 88.6 | 66.3 | 83.7 | 85.8 | 87.2 | 72.5 | 89.1 | 87.6 | 87.8 | 78.0 | 65.7 | 83.1 | 84.6 |
| (d) Latin        | 83.6 | 81.2 | 87.5 | 86.2 | 80.0 | 79.5 | 70.3 | 80.3 | 81.1 | 77.2 | 79.9 | 61.8 | 82.6 | 89.6 | 76.3 | 84.2 | 83.0 | 83.8 | 70.0 | 75.0 | 74.9 |
| (e) Freq         | 87.3 | 80.6 | 81.9 | 91.6 | 83.4 | 79.4 | 68.8 | 85.7 | 77.3 | 66.8 | 86.0 | 56.5 | 88.8 | 74.3 | 81.3 | 87.1 | 84.4 | 76.5 | 49.1 | 81.9 | 78.6 |
| min((a) – (c–e)) | 7.4  | 5.4  | 3.9  | 0.3  | 3.7  | 6.6  | 11.0 | 0.4  | 1.9  | 1.0  | 4.7  | 3.6  | 0.4  | 2.7  | 0.5  | 5.9  | 0.8  | 0.1  | 26.4 | 2.2  | 6.8  |

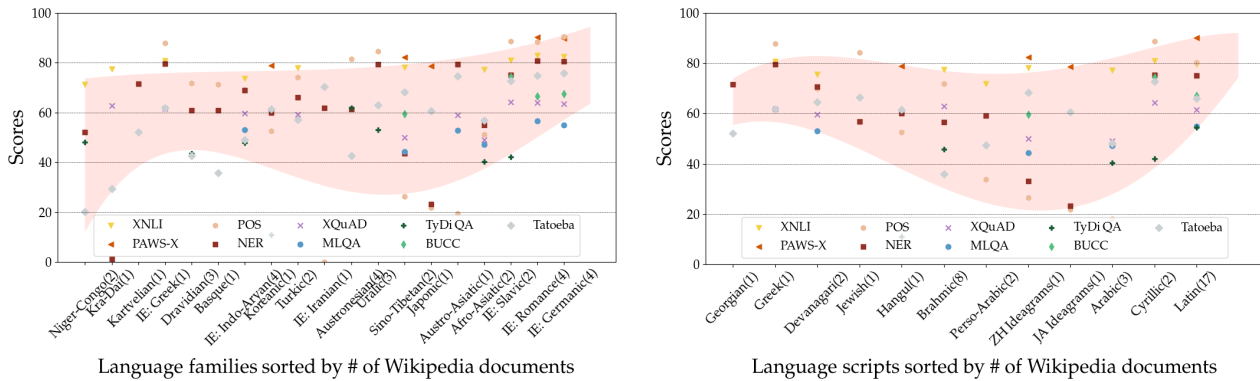

Figure 3. Performance of XLM-R across tasks grouped by language families (left) and scripts (right). The number of languages per group is in brackets and the groups are from low-resource to high-resource on the x-axis. We additionally plot the 3rd order polynomial fit for the minimum and maximum values for each group.

XTREME: A Benchmark for Evaluating Cross-lingual generalization

Table 8. XNLI accuracy scores for each language.

| Model                               | en          | ar          | bg          | de          | el          | es          | fr          | hi          | ru          | sw          | th          | tr          | ur          | vi          | zh          | avg         |
|-------------------------------------|-------------|-------------|-------------|-------------|-------------|-------------|-------------|-------------|-------------|-------------|-------------|-------------|-------------|-------------|-------------|-------------|
| mBERT                               | 80.8        | 64.3        | 68.0        | 70.0        | 65.3        | 73.5        | 73.4        | 58.9        | 67.8        | 49.7        | 54.1        | 60.9        | 57.2        | 69.3        | 67.8        | 65.4        |
| XLM                                 | 82.8        | 66.0        | 71.9        | 72.7        | 70.4        | 75.5        | 74.3        | 62.5        | 69.9        | 58.1        | 65.5        | 66.4        | 59.8        | 70.7        | 70.2        | 69.1        |
| XLMR                                | <b>88.7</b> | <b>77.2</b> | <b>83.0</b> | <b>82.5</b> | <b>80.8</b> | <b>83.7</b> | <b>82.2</b> | <b>75.6</b> | <b>79.1</b> | <b>71.2</b> | <b>77.4</b> | <b>78.0</b> | <b>71.7</b> | <b>79.3</b> | <b>78.2</b> | <b>79.2</b> |
| MMTE                                | 79.6        | 64.9        | 70.4        | 68.2        | 67.3        | 71.6        | 69.5        | 63.5        | 66.2        | 61.9        | 66.2        | 63.6        | 60.0        | 69.7        | 69.2        | 67.5        |
| <i>Translate-train (multi-task)</i> | 81.9        | <b>73.8</b> | <b>77.6</b> | <b>77.6</b> | <b>75.9</b> | <b>79.1</b> | <b>77.8</b> | 70.7        | <b>75.4</b> | <b>70.5</b> | 70.0        | 74.3        | <b>67.4</b> | <b>77.0</b> | <b>77.6</b> | <b>75.1</b> |
| <i>Translate-train</i>              | 80.8        | 73.6        | 76.6        | 77.4        | 75.7        | 78.1        | 77.4        | <b>71.9</b> | 75.2        | 69.4        | <b>70.9</b> | <b>75.3</b> | 67.2        | 75.0        | 74.1        | 74.6        |
| <i>Translate-test</i>               | <b>85.9</b> | 73.1        | 76.6        | 76.9        | 75.3        | 78.0        | 77.5        | 69.1        | 74.8        | 68.0        | 67.1        | 73.5        | 66.4        | 76.6        | 76.3        | 76.8        |

Table 9. Tatoeba results (Accuracy) for each language

| Lang. | af          | ar          | bg          | bn          | de          | el          | es          | et          | eu          | fa          | fi          | fr          | he          | hi          | hu          | id          | it          | ja          |
|-------|-------------|-------------|-------------|-------------|-------------|-------------|-------------|-------------|-------------|-------------|-------------|-------------|-------------|-------------|-------------|-------------|-------------|-------------|
| BERT  | 42.7        | 25.8        | 49.3        | 17          | 77.2        | 29.8        | 68.7        | 29.3        | 25.5        | 46.1        | 39          | 66.3        | 41.9        | 34.8        | 38.7        | 54.6        | 58.4        | 42          |
| XLM   | 43.2        | 18.2        | 40          | 13.5        | 66.2        | 25.6        | 58.4        | 24.8        | 17.1        | 32.2        | 32.2        | 54.5        | 32.1        | 26.5        | 30.1        | 45.9        | 56.5        | 40          |
| XLMR  | <b>58.2</b> | <b>47.5</b> | <b>71.6</b> | <b>43</b>   | <b>88.8</b> | <b>61.8</b> | <b>75.7</b> | <b>52.2</b> | <b>35.8</b> | <b>70.5</b> | <b>71.6</b> | <b>73.7</b> | <b>66.4</b> | <b>72.2</b> | <b>65.4</b> | <b>77</b>   | <b>68.3</b> | <b>60.6</b> |
|       | jv          | ka          | kk          | ko          | ml          | mr          | nl          | pt          | ru          | sw          | ta          | te          | th          | tl          | tr          | ur          | vi          | zh          |
| BERT  | 17.6        | 20.5        | 27.1        | 38.5        | 19.8        | 20.9        | 68          | 69.9        | 61.2        | 11.5        | 14.3        | 16.2        | 13.7        | 16          | 34.8        | <b>31.6</b> | 62          | <b>71.6</b> |
| XLM   | <b>22.4</b> | 22.9        | 17.9        | 25.5        | 20.1        | 13.9        | 59.6        | 63.9        | 44.8        | 12.6        | 20.2        | 12.4        | <b>31.8</b> | 14.8        | 26.2        | 18.1        | 47.1        | 42.2        |
| XLMR  | 14.1        | <b>52.1</b> | <b>48.5</b> | <b>61.4</b> | <b>65.4</b> | <b>56.8</b> | <b>80.8</b> | <b>82.2</b> | <b>74.1</b> | <b>20.3</b> | <b>26.4</b> | <b>35.9</b> | 29.4        | <b>36.7</b> | <b>65.7</b> | 24.3        | <b>74.7</b> | 68.3        |

Table 10. Three types of sentence embeddings from mBERT in BUCC tasks: (1) CLS token embeddings in the last layer; (2) Average word embeddings in the middle layers, i.e., Layer 6, 7, 8; (3) the concatenation of average word embeddings in the continuous four layers, i.e., Layer 1-4 (bottom layers), Layer 5-8 (middle layers), Layer 9-12 (top layers).

| Type       | de    | fr    | zh    | ru    |
|------------|-------|-------|-------|-------|
| CLS        | 3.88  | 4.73  | 0.89  | 2.15  |
| Layer 6    | 51.29 | 56.32 | 41.38 | 38.81 |
| Layer 7    | 62.51 | 62.62 | 49.99 | 51.84 |
| Layer 8    | 64.32 | 62.46 | 50.49 | 53.58 |
| Layer 1-4  | 6.98  | 12.3  | 12.05 | 4.33  |
| Layer 5-8  | 63.12 | 63.42 | 52.84 | 51.67 |
| Layer 9-12 | 53.97 | 52.68 | 44.18 | 43.13 |

Table 11. PAWS-X accuracy scores for each language.

| Model                               | en          | de          | es          | fr          | ja          | ko          | zh          | avg         |
|-------------------------------------|-------------|-------------|-------------|-------------|-------------|-------------|-------------|-------------|
| mBERT                               | 94.0        | 85.7        | 87.4        | 87.0        | 73.0        | 69.6        | 77.0        | 81.9        |
| XLM                                 | 94.0        | 85.9        | 88.3        | 87.4        | 69.3        | 64.8        | 76.5        | 80.9        |
| XLMR                                | <b>94.7</b> | <b>89.7</b> | <b>90.1</b> | <b>90.4</b> | <b>78.7</b> | <b>79.0</b> | <b>82.3</b> | <b>86.4</b> |
| MMTE                                | 93.1        | 85.1        | 87.2        | 86.9        | 72.0        | 69.2        | 75.9        | 81.3        |
| <i>Translate-train</i>              | 94.0        | 87.5        | 89.4        | 89.6        | 78.6        | 81.6        | 83.5        | 86.3        |
| <i>Translate-train (multi-task)</i> | <b>94.5</b> | <b>90.5</b> | <b>91.6</b> | <b>91.7</b> | <b>84.4</b> | <b>83.9</b> | <b>85.8</b> | <b>88.9</b> |
| <i>Translate-test</i>               | 93.5        | 88.2        | 89.3        | 87.4        | 78.4        | 76.6        | 77.6        | 84.4        |

(XQuAD), 15 (MLQA), 14 (TyDiQA-GoldP), 12 (BUCC), and 9 (Tatoeba).

Table 12. BUCC results (F1 scores) for each languages.

| Model | de          | fr          | ru          | zh          | avg         |
|-------|-------------|-------------|-------------|-------------|-------------|
| BERT  | 62.5        | 62.6        | 51.8        | 50.0        | 56.7        |
| XLM   | 56.3        | 63.9        | 60.6        | 46.6        | 56.8        |
| XLMR  | 67.5        | <b>66.5</b> | <b>73.5</b> | <b>56.7</b> | <b>66.0</b> |
| MMTE  | <b>67.9</b> | 63.9        | 54.3        | 53.3        | 59.8        |

References

Hsu, T.-y., Liu, C.-l., and Lee, H.-y. Zero-shot Reading Comprehension by Cross-lingual Transfer Learning with Multi-lingual Language Representation Model. In *Proceedings of EMNLP 2019*, pp. 5935–5942, 2019.

Lee, K., Yoon, K., Park, S., and Hwang, S. W. Semi-supervised training data generation for multilingual question answering. In *Proceedings of LREC 2018*, pp. 2758–2762, 2018.

Lewis, P., Ouz, B., Rinott, R., Riedel, S., and Schwenk, H. MLQA: Evaluating Cross-lingual Extractive Question Answering. *arXiv preprint arXiv:1910.07475*, 2019.

Wolf, T., Debut, L., Sanh, V., Chaumond, J., Delangue, C., Moi, A., Cistac, P., Rault, T., Louf, R., Funtowicz, M., et al. Huggingface’s transformers: State-of-the-art natural language processing. *arXiv preprint arXiv:1910.03771*, 2019.

XTREME: A Benchmark for Evaluating Cross-lingual generalization

Table 13. XQuAD results (F1 / EM) for each language.

| Model                               | en                 | ar                 | de                 | el                 | es                 | hi                 | ru                 | th                 | tr                 | vi                 | zh                 | avg                |
|-------------------------------------|--------------------|--------------------|--------------------|--------------------|--------------------|--------------------|--------------------|--------------------|--------------------|--------------------|--------------------|--------------------|
| mBERT                               | 83.5 / 72.2        | 61.5 / 45.1        | 70.6 / 54.0        | 62.6 / 44.9        | 75.5 / 56.9        | 59.2 / 46.0        | 71.3 / 53.3        | 42.7 / 33.5        | 55.4 / 40.1        | 69.5 / 49.6        | 58.0 / 48.3        | 64.5 / 49.4        |
| XLM                                 | 74.2 / 62.1        | 61.4 / 44.7        | 66.0 / 49.7        | 57.5 / 39.1        | 68.2 / 49.8        | 56.6 / 40.3        | 65.3 / 48.2        | 35.4 / 24.5        | 57.9 / 41.2        | 65.8 / 47.6        | 49.7 / 39.7        | 59.8 / 44.3        |
| XLMR                                | <b>86.5 / 75.7</b> | <b>68.6 / 49.0</b> | <b>80.4 / 63.4</b> | <b>79.8 / 61.7</b> | <b>82.0 / 63.9</b> | <b>76.7 / 59.7</b> | <b>80.1 / 64.3</b> | <b>74.2 / 62.8</b> | <b>75.9 / 59.3</b> | <b>79.1 / 59.0</b> | <b>59.3 / 50.0</b> | <b>76.6 / 60.8</b> |
| MMTE                                | 80.1 / 68.1        | 63.2 / 46.2        | 68.8 / 50.3        | 61.3 / 35.9        | 72.4 / 52.5        | 61.3 / 47.2        | 68.4 / 45.2        | 48.4 / 35.9        | 58.1 / 40.9        | 70.9 / 50.1        | 55.8 / 36.4        | 64.4 / 46.2        |
| <i>Translate-train</i>              | 83.5 / 72.2        | 68.0 / 51.1        | 75.6 / 60.7        | 70.0 / 53.0        | 80.2 / 63.1        | 69.6 / 55.4        | 75.0 / 59.7        | 36.9 / 33.5        | 68.9 / 54.8        | 75.6 / 56.2        | 66.2 / 56.6        | 70.0 / 56.0        |
| <i>Translate-train (multi-task)</i> | 86.0 / 74.5        | 71.0 / 54.1        | 78.8 / 63.9        | 74.2 / 56.1        | 82.4 / 66.2        | 71.3 / 56.2        | 78.1 / 63.0        | 38.1 / 34.5        | 70.6 / 55.7        | 78.5 / 58.8        | 67.7 / 58.7        | 72.4 / 58.3        |
| <i>Translate-test</i>               | <b>87.9 / 77.1</b> | <b>73.7 / 58.8</b> | <b>79.8 / 66.7</b> | <b>79.4 / 65.5</b> | <b>82.0 / 68.4</b> | <b>74.9 / 60.1</b> | <b>79.9 / 66.7</b> | <b>64.6 / 50.0</b> | <b>67.4 / 49.6</b> | <b>76.3 / 61.5</b> | <b>73.7 / 59.1</b> | <b>76.3 / 62.1</b> |

Table 14. TyDiQA-GoldP results (F1 / EM) for each language.

| Model                               | en                 | ar                 | bn                 | fi                 | id                 | ko                 | ru                 | sw                 | te                 | avg                |
|-------------------------------------|--------------------|--------------------|--------------------|--------------------|--------------------|--------------------|--------------------|--------------------|--------------------|--------------------|
| mBERT                               | <b>75.3 / 63.6</b> | 62.2 / 42.8        | 49.3 / 32.7        | 59.7 / 45.3        | 64.8 / 45.8        | <b>58.8 / 50.0</b> | 60.0 / 38.8        | 57.5 / 37.9        | 49.6 / 38.4        | 59.7 / 43.9        |
| XLM                                 | 66.9 / 53.9        | 59.4 / 41.2        | 27.2 / 15.0        | 58.2 / 41.4        | 62.5 / 45.8        | 14.2 / 5.1         | 49.2 / 30.7        | 39.4 / 21.6        | 15.5 / 6.9         | 43.6 / 29.1        |
| XLM-R                               | 71.5 / 56.8        | <b>67.6 / 40.4</b> | <b>64.0 / 47.8</b> | <b>70.5 / 53.2</b> | <b>77.4 / 61.9</b> | 31.9 / 10.9        | <b>67.0 / 42.1</b> | <b>66.1 / 48.1</b> | <b>70.1 / 43.6</b> | <b>65.1 / 45.0</b> |
| MMTE                                | 62.9 / 49.8        | 63.1 / 39.2        | 55.8 / 41.9        | 53.9 / 42.1        | 60.9 / 47.6        | 49.9 / 42.6        | 58.9 / 37.9        | 63.1 / 47.2        | 54.2 / 45.8        | 58.1 / 43.8        |
| <i>Translate-train</i>              | 75.3 / 63.6        | 61.5 / 44.1        | 31.9 / 31.9        | 62.6 / 49.0        | 68.6 / 52.0        | 53.2 / 41.3        | 53.1 / 33.9        | 61.9 / 45.5        | 27.4 / 17.5        | 55.1 / 42.1        |
| <i>Translate-train (multi-task)</i> | 73.2 / 62.5        | <b>71.8 / 54.2</b> | 49.7 / 36.3        | 68.1 / 53.6        | 72.3 / 55.2        | 58.6 / 47.8        | 64.3 / 45.3        | 66.8 / 48.9        | 53.3 / 40.2        | 64.2 / 49.3        |
| <i>Translate-test</i>               | <b>75.9 / 65.9</b> | 68.8 / 49.6        | <b>66.7 / 48.1</b> | <b>72.0 / 56.6</b> | <b>76.8 / 60.9</b> | <b>69.2 / 55.7</b> | <b>71.4 / 54.3</b> | <b>73.3 / 53.8</b> | <b>75.1 / 59.2</b> | <b>72.1 / 56.0</b> |
| <i>Monolingual</i>                  | 75.3 / 63.6        | 80.5 / 67.0        | 71.1 / 60.2        | 75.6 / 64.1        | <b>81.3 / 70.4</b> | 59.0 / 49.6        | 72.1 / 56.2        | 75.0 / 66.7        | 80.2 / 66.4        | 74.5 / 62.7        |
| <i>Monolingual few-shot</i>         | 63.1 / 50.9        | 61.3 / 44.8        | 58.7 / 49.6        | 51.4 / 38.1        | 70.4 / 58.1        | 45.4 / 38.4        | 56.9 / 42.6        | 55.4 / 46.3        | 65.2 / 49.6        | 58.7 / 46.5        |
| <i>Joint monolingual</i>            | <b>77.6 / 69.3</b> | <b>82.7 / 69.4</b> | <b>79.6 / 69.9</b> | <b>79.2 / 67.8</b> | 68.9 / 72.7        | <b>68.9 / 59.4</b> | <b>75.8 / 59.2</b> | <b>81.9 / 74.3</b> | <b>83.4 / 70.3</b> | <b>77.6 / 68.0</b> |

Table 15. MLQA results (F1 / EM) for each language.

| Model                               | en                 | ar                 | de                 | es                 | hi                 | vi                 | zh                 | avg                |
|-------------------------------------|--------------------|--------------------|--------------------|--------------------|--------------------|--------------------|--------------------|--------------------|
| mBERT                               | 80.2 / 67.0        | 52.3 / 34.6        | 59.0 / 43.8        | 67.4 / 49.2        | 50.2 / 35.3        | 61.2 / 40.7        | 59.6 / 38.6        | 61.4 / 44.2        |
| XLM                                 | 68.6 / 55.2        | 42.5 / 25.2        | 50.8 / 37.2        | 54.7 / 37.9        | 34.4 / 21.1        | 48.3 / 30.2        | 40.5 / 21.9        | 48.5 / 32.6        |
| XLM-R                               | <b>83.5 / 70.6</b> | <b>66.6 / 47.1</b> | <b>70.1 / 54.9</b> | <b>74.1 / 56.6</b> | <b>70.6 / 53.1</b> | <b>74 / 52.9</b>   | <b>62.1 / 37.0</b> | <b>71.6 / 53.2</b> |
| MMTE                                | 78.5 / -           | 56.1 / -           | 58.4 / -           | 64.9 / -           | 46.2 / -           | 59.4 / -           | 58.3 / -           | 60.3 / 41.4        |
| <i>Translate-train</i>              | 80.2 / 67.0        | 55.0 / 35.6        | 64.4 / 49.4        | 70.0 / 52.0        | 60.1 / 43.4        | 65.7 / 45.5        | 63.9 / 42.7        | 65.6 / 47.9        |
| <i>Translate-train (multi-task)</i> | 80.7 / 67.7        | 58.9 / 39.0        | 66.0 / 51.6        | 71.3 / 53.7        | 62.4 / 45.0        | 67.9 / 47.6        | 66.0 / 43.9        | 67.6 / 49.8        |
| <i>Translate-test</i>               | <b>83.8 / 71.0</b> | <b>65.3 / 46.4</b> | <b>71.2 / 54.0</b> | <b>73.9 / 55.9</b> | <b>71.0 / 55.1</b> | <b>70.6 / 54.0</b> | <b>67.2 / 50.6</b> | <b>71.9 / 55.3</b> |

Table 16. POS results (Accuracy) for each language

| Lang. | af          | ar          | bg          | de          | el          | en          | es          | et          | eu          | fa          | fi          | fr          | he          | hi          | hu          | id          | it          |
|-------|-------------|-------------|-------------|-------------|-------------|-------------|-------------|-------------|-------------|-------------|-------------|-------------|-------------|-------------|-------------|-------------|-------------|
| mBERT | 86.6        | 56.2        | 85.0        | 85.2        | 81.1        | 95.5        | 86.9        | 79.1        | 60.7        | 66.7        | 78.9        | 84.2        | 56.2        | 67.2        | 78.3        | 71.0        | 88.4        |
| XLM   | 88.5        | 63.1        | 85.0        | 85.8        | 84.3        | 95.4        | 85.8        | 78.3        | 62.8        | 64.7        | 78.4        | 82.8        | 65.9        | 66.2        | 77.3        | 70.2        | 87.4        |
| XLMR  | <b>89.8</b> | <b>67.5</b> | <b>88.1</b> | <b>88.5</b> | <b>86.3</b> | 96.1        | <b>88.3</b> | <b>86.5</b> | <b>72.5</b> | <b>70.6</b> | <b>85.8</b> | <b>87.2</b> | <b>68.3</b> | <b>76.4</b> | <b>82.6</b> | 72.4        | <b>89.4</b> |
| MMTE  | 86.2        | 65.9        | 87.2        | 85.8        | 77.7        | <b>96.6</b> | 85.8        | 81.6        | 61.9        | 67.3        | 81.1        | 84.3        | 57.3        | 76.4        | 78.1        | <b>73.5</b> | 89.2        |
|       | ja          | kk          | ko          | mr          | nl          | pt          | ru          | ta          | te          | th          | tl          | tr          | ur          | vi          | yo          | zh          | avg         |
| mBERT | <b>49.2</b> | 70.5        | 49.6        | 69.4        | 88.6        | 86.2        | 85.5        | 59.0        | 75.9        | 41.7        | 81.4        | 68.5        | 57.0        | 53.2        | <b>55.7</b> | 61.6        | 71.5        |
| XLM   | 49.0        | 70.2        | 50.1        | 68.7        | 88.1        | 84.9        | 86.5        | 59.8        | 76.8        | 55.2        | 76.3        | 66.4        | 61.2        | 52.4        | 20.5        | 65.4        | 71.3        |
| XLMR  | 15.9        | <b>78.1</b> | 53.9        | <b>80.8</b> | <b>89.5</b> | <b>87.6</b> | <b>89.5</b> | <b>65.2</b> | <b>86.6</b> | <b>47.2</b> | <b>92.2</b> | <b>76.3</b> | <b>70.3</b> | <b>56.8</b> | 24.6        | 25.7        | <b>73.8</b> |
| MMTE  | 48.6        | 70.5        | <b>59.3</b> | 74.4        | 83.2        | 86.1        | 88.1        | 63.7        | 81.9        | 43.1        | 80.3        | 71.8        | 61.1        | 56.2        | 51.9        | <b>68.1</b> | 73.5        |

XTREME: A Benchmark for Evaluating Cross-lingual generalization

Table 17. NER results (F1 Score) for each language

| Lang. | en          | af          | ar          | bg          | bn          | de          | el          | es          | et          | eu          | fa          | fi          | fr          | he          | hi          | hu          | id          | it          | ja          | jv          |
|-------|-------------|-------------|-------------|-------------|-------------|-------------|-------------|-------------|-------------|-------------|-------------|-------------|-------------|-------------|-------------|-------------|-------------|-------------|-------------|-------------|
| mBERT | <b>85.2</b> | 77.4        | 41.1        | 77.0        | 70.0        | 78.0        | 72.5        | 77.4        | 75.4        | <b>66.3</b> | 46.2        | 77.2        | 79.6        | 56.6        | 65.0        | 76.4        | <b>53.5</b> | <b>81.5</b> | 29.0        | <b>66.4</b> |
| XLM   | 82.6        | 74.9        | 44.8        | 76.7        | 70.0        | 78.1        | 73.5        | 74.8        | 74.8        | 62.3        | 49.2        | 79.6        | 78.5        | 57.7        | 66.1        | 76.5        | 53.1        | 80.7        | 23.6        | 63.0        |
| XLMR  | 84.7        | <b>78.9</b> | <b>53.0</b> | <b>81.4</b> | <b>78.8</b> | <b>78.8</b> | <b>79.5</b> | <b>79.6</b> | <b>79.1</b> | 60.9        | <b>61.9</b> | <b>79.2</b> | <b>80.5</b> | <b>56.8</b> | <b>73.0</b> | <b>79.8</b> | 53.0        | 81.3        | 23.2        | 62.5        |
| MMTE  | 77.9        | 74.9        | 41.8        | 75.1        | 64.9        | 71.9        | 68.3        | 71.8        | 74.9        | 62.6        | 45.6        | 75.2        | 73.9        | 54.2        | 66.2        | 73.8        | 47.9        | 74.1        | <b>31.2</b> | 63.9        |
|       | ka          | kk          | ko          | ml          | mr          | ms          | my          | nl          | pt          | ru          | sw          | ta          | te          | th          | tl          | tr          | ur          | vi          | yo          | zh          |
| mBERT | 64.6        | 45.8        | 59.6        | 52.3        | 58.2        | <b>72.7</b> | 45.2        | 81.8        | 80.8        | 64.0        | 67.5        | 50.7        | 48.5        | 3.6         | 71.7        | 71.8        | 36.9        | 71.8        | <b>44.9</b> | <b>42.7</b> |
| XLM   | 67.7        | <b>57.2</b> | 26.3        | 59.4        | 62.4        | 69.6        | 47.6        | 81.2        | 77.9        | 63.5        | 68.4        | 53.6        | 49.6        | 0.3         | <b>78.6</b> | 71.0        | 43.0        | 70.1        | 26.5        | 32.4        |
| XLMR  | <b>71.6</b> | 56.2        | <b>60.0</b> | <b>67.8</b> | <b>68.1</b> | 57.1        | <b>54.3</b> | <b>84.0</b> | <b>81.9</b> | <b>69.1</b> | <b>70.5</b> | <b>59.5</b> | <b>55.8</b> | 1.3         | 73.2        | <b>76.1</b> | <b>56.4</b> | <b>79.4</b> | 33.6        | 33.1        |
| MMTE  | 60.9        | 43.9        | 58.2        | 44.8        | 58.5        | 68.3        | 42.9        | 74.8        | 72.9        | 58.2        | 66.3        | 48.1        | 46.9        | <b>3.9</b>  | 64.1        | 61.9        | 37.2        | 68.1        | 32.1        | 28.9        |
